# Supplementary material
Source: PubMed Central journal article supplement (PMC5608928)
Supplement: irdr-6-183_001.pdf [file irdr-6-183_001.pdf]

Supplementary Data

**Table S1. Characterization of deceased patients**

| MPS                        | Age of<br>Diagnosis | Age of<br>onset of ERT | Period or ERT<br>(weeks) | Age at death | Cause                                   |
|----------------------------|---------------------|------------------------|--------------------------|--------------|-----------------------------------------|
| MPS I – Hurler             | 2y                  | 2y4m                   | 148                      | 5y6m         | Anesthesia<br>complication              |
| MPS I –<br>Hurler-Scheie   | 4y                  | 10y                    | 136                      | 13y10m       | Sepsis, hernia<br>rupture               |
| MPS I – Hurler-<br>Scheie  | 2y 6m               | 10y                    | 289                      | 18y5m        | Pneumonia,<br>Pulmonary<br>hypertension |
| MPS II – Hunter            | 5y                  | 7y4m                   | 230                      | 13y9m        | Anesthesia<br>complication              |
| MPS II – Hunter            | 10y                 | 19y                    | 139                      | 23y          | Pneumonia,<br>cachexia                  |
| MPS VI –<br>Marateaux Lamy | 3y 8m               | 6y7m                   | 317                      | 13y5m        | Pulmonary<br>hypertension               |

y: year; m: month

Supplementary Data

**Table S2. Mutations for all MPS patients**

| MPS                   | Gene                  | Patient | Mutation                |
|-----------------------|-----------------------|---------|-------------------------|
| MPS I – Hurler        | <i>IDUA</i>           | 1       | p.W402X in heterozygous |
|                       |                       | 2       | p.W402X in homozygous   |
|                       |                       | 3       | NP                      |
|                       |                       | 4       | p.H20140R / p.A79T      |
|                       |                       | 5       | NP                      |
| MPS I – Hurler-Scheie | <i>IDUA</i>           | 6       | p.W402X in homozygous   |
|                       |                       | 7       | p.533R in homozygous    |
|                       |                       | 8       | p.W402X in homozygous   |
|                       |                       | 9       | NP                      |
|                       |                       | 10      | NP                      |
| MPS I – Scheie        | <i>IDUA</i>           | 11      | } p.W402X/deltaD445     |
|                       |                       | 12      |                         |
|                       |                       | 13      |                         |
|                       |                       | 14      | p.P156Q                 |
|                       |                       | 15      | p.P86L                  |
| MPS II – Hunter       | <i>IDS</i>            | 16      | NP                      |
|                       |                       | 17      | R443X                   |
|                       |                       | 18      | Inconclusive            |
|                       |                       | 19      | c.153delG               |
|                       |                       | 20      | p.S305P                 |
|                       |                       | 21      | p.S333L                 |
|                       |                       | 22      | <i>ARSB</i> IVS5-8T>G   |
| 23                    | <i>ARSB</i> IVS5-8T>G |         |                         |
| MPS VI – Marateaux    | <i>ARSB</i>           | 24      | p.R197X                 |
| Lamy                  | <i>ARSB</i>           | 25      | NP                      |
|                       |                       | 26      | NP                      |
|                       |                       | 27      | NP                      |

NP- not performed
